# Supplementary material for: Traceless switch organocatalysis enables multiblock ring-opening copolymerizations of lactones, carbonates, and lactides: by a one plus one approach in one pot
Source: Royal Society of Chemistry journal article supplement (doi:10.1039/c6py01107a), 2016-01-01
Supplement: c6py01107a1.pdf [file c6py01107a1.pdf]

Supporting Information

**Traceless switch organocatalysis enables multiblock ring-opening copolymerizations of lactones, carbonate, and lactide: by one plus one and in one-pot**

Xin Wang, Jiaqi Liu, Songquan Xu, Jiayi Xu, Xianfu Pan, Jingjing Liu, Saide Cui, Zhenjiang Li,\* Kai Guo\*

State Key Laboratory of Materials-Oriented Chemical Engineering, College of Biotechnology and Pharmaceutical Engineering, Nanjing Tech University, 30 Puzhu Road South, Nanjing 211816, China.

E-mail: guok@njtech.edu.cn; zjli@njtech.edu.cn.

## Contents

|                            |   |
|----------------------------|---|
| Experimental section ..... | 3 |
| Figure S1 .....            | 4 |
| Figure S2 .....            | 5 |
| Figure S3 .....            | 6 |
| Figure S4 .....            | 6 |
| Figure S5 .....            | 7 |
| Figure S6 .....            | 8 |
| Figure S7 .....            | 9 |
| Figure S8 .....            | 9 |

## Experimental section

### One-pot synthesis of poly( $\epsilon$ -caprolactone)-*b*-poly(L-lactide)-*b*- poly(trimethylene carbonate) and poly( $\delta$ -valerolactone)-*b*-poly(L-lactide)-*b*-poly(trimethylene carbonate) triblock terpolymers.

Following the Procedure of synthesis of PVL-*b*-PLLA, TMC (183.6 mg, 1.8 mmol) was placed to the mixture of PVL-*b*-PLA to start the third polymerization. After 6 h, the whole third polymerization was quenched by addition of triethylamine and benzoic acid. Before this step, an aliquot of the reaction mixture was obtained and an excess of triethylamine and benzoic acid was added for determining the monomer conversion from  $^1\text{H}$  NMR measurements. The triblock terpolymer (PVL-*b*-PLLA-*b*-PTMC) was isolated by reprecipitation in cold methanol, and then was filtered and dried under vacuum. Conv.: 95 %.  $M_{n, \text{NMR}} = 14200 \text{ g mol}^{-1}$ ;  $M_w/M_n = 1.30$ .  $^1\text{H}$  NMR ( $\text{CDCl}_3$ , 300 MHz):  $\delta$  (ppm) 1.57 (q,  $3\text{H} \times m$  ( $-\text{CH}_3$ ) $_m$ ), 1.68 (m,  $2\text{H} \times n$ , ( $-\text{CH}_2\text{CH}_2\text{CH}_2\text{O}-$ ) $_n$ ); m,  $2\text{H} \times n$ , ( $-\text{COCH}_2\text{CH}_2\text{CH}_2-$ ) $_n$ ), 2.01–2.05 (m,  $2\text{H} \times j - 1$ , ( $-\text{OCH}_2\text{CH}_2-$ ) $_{j-1}$ ); q,  $2\text{H}$ , ( $-\text{CH}_2\text{CH}_2\text{OH}$ ), 2.34 (t,  $2\text{H} \times n$ , ( $-\text{OCOCH}_2\text{CH}_2-$ ) $_n$ ), 3.74 (t,  $2\text{H}$ ,  $-\text{CH}_2\text{OH}$ ), 4.08 (t,  $2\text{H} \times n$ , ( $-\text{CH}_2\text{CH}_2\text{O}-$ ) $_n$ ), 4.18–4.34 (m,  $4\text{H} \times j - 1$ , ( $-\text{OCH}_2\text{CH}_2\text{CH}_2\text{O}-$ ) $_{j-1}$ ); m,  $2\text{H}$ ,  $-\text{OCH}_2\text{CH}_2\text{CH}_2\text{OH}$ ), 5.11–5.23 (q,  $1\text{H} \times m$ , ( $-\text{CH}(\text{CH}_3)\text{O}-$ ) $_m$ ); s,  $2\text{H}$ ,  $\text{ArCH}_2\text{O}$ ), 7.24–7.41 (m,  $5\text{H}$ , aromatic).

A similar condition was used for one-pot block copolymerization of CL and LA with TMC to precisely synthesize triblock terpolymer of PCL-*b*-PLLA-*b*-PTMC. Conv.: 94 %.  $M_{n, \text{NMR}} = 15700 \text{ g mol}^{-1}$ ;  $M_w/M_n = 1.37$ .  $^1\text{H}$  NMR ( $\text{CDCl}_3$ , 300 MHz):  $\delta$  (ppm) 1.40 (m,  $2\text{H} \times n$ , ( $-\text{CH}_2\text{CH}_2\text{CH}_2\text{CH}_2\text{CH}_2-$ ) $_n$ ), 1.54 (q,  $3\text{H} \times m$  ( $-\text{CH}_3$ ) $_m$ ), 1.65 (m,  $2\text{H} \times 2n$ , ( $-\text{CH}_2\text{CH}_2\text{CH}_2\text{CH}_2\text{O}-$ ) $_n$ ), 1.95–2.12 (m,  $2\text{H} \times j - 1$ , ( $-\text{OCH}_2\text{CH}_2-$ ) $_{j-1}$ ); q,  $2\text{H}$ ,  $-\text{CH}_2\text{CH}_2\text{OH}$ ), 2.31 (t,  $2\text{H} \times n$ , ( $-\text{OCOCH}_2\text{CH}_2-$ ) $_n$ ), 3.75 (t,  $2\text{H}$ ,  $-\text{CH}_2\text{OH}$ ), 4.06 (t,  $2\text{H} \times n$ , ( $-\text{CH}_2\text{CH}_2\text{O}-$ ) $_n$ ), 4.18–4.36 (m,  $4\text{H} \times j - 1$ , ( $-\text{OCH}_2\text{CH}_2\text{CH}_2\text{O}-$ ) $_{j-1}$ ); m,  $2\text{H}$ ,  $-\text{OCH}_2\text{CH}_2\text{CH}_2\text{OH}$ ), 5.10–5.26 (q,  $1\text{H} \times m$ , ( $-\text{CH}(\text{CH}_3)\text{O}-$ ) $_m$ ); s,  $2\text{H}$ ,  $\text{ArCH}_2\text{O}$ ), 7.21–7.43 (m,  $5\text{H}$ , aromatic).

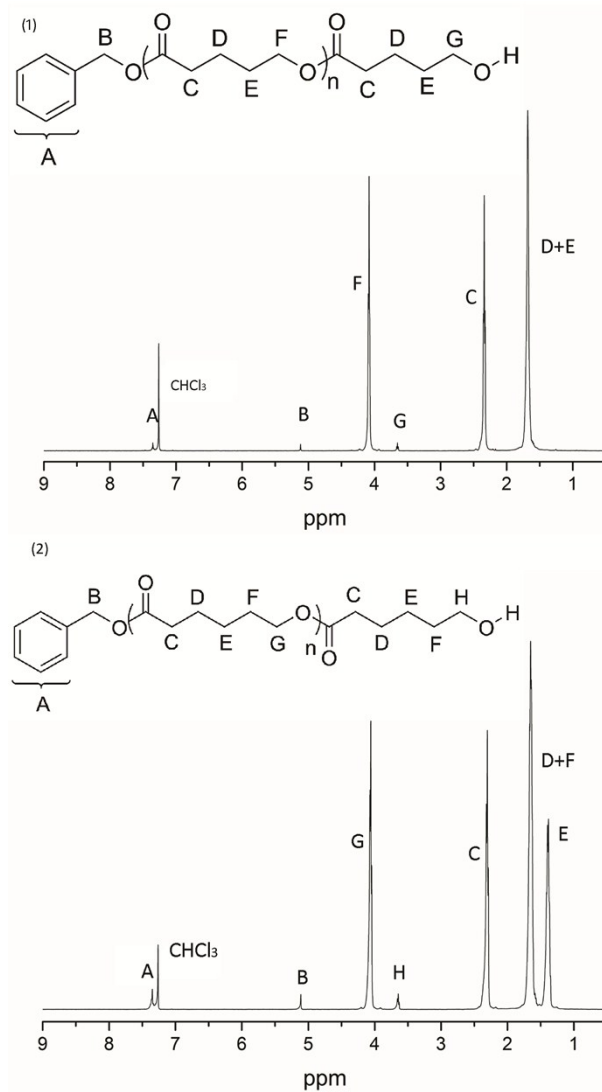

**Figure S1:** The  $^1\text{H}$  NMR spectra (CDCl<sub>3</sub>, 300 MHz) of (1) poly( $\delta$ -valerolactone) (PVL, Table 1, run1) and (2) poly( $\epsilon$ -caprolactone) (PCL, Table 1, run 5) initiated from benzyl alcohol (BnOH).

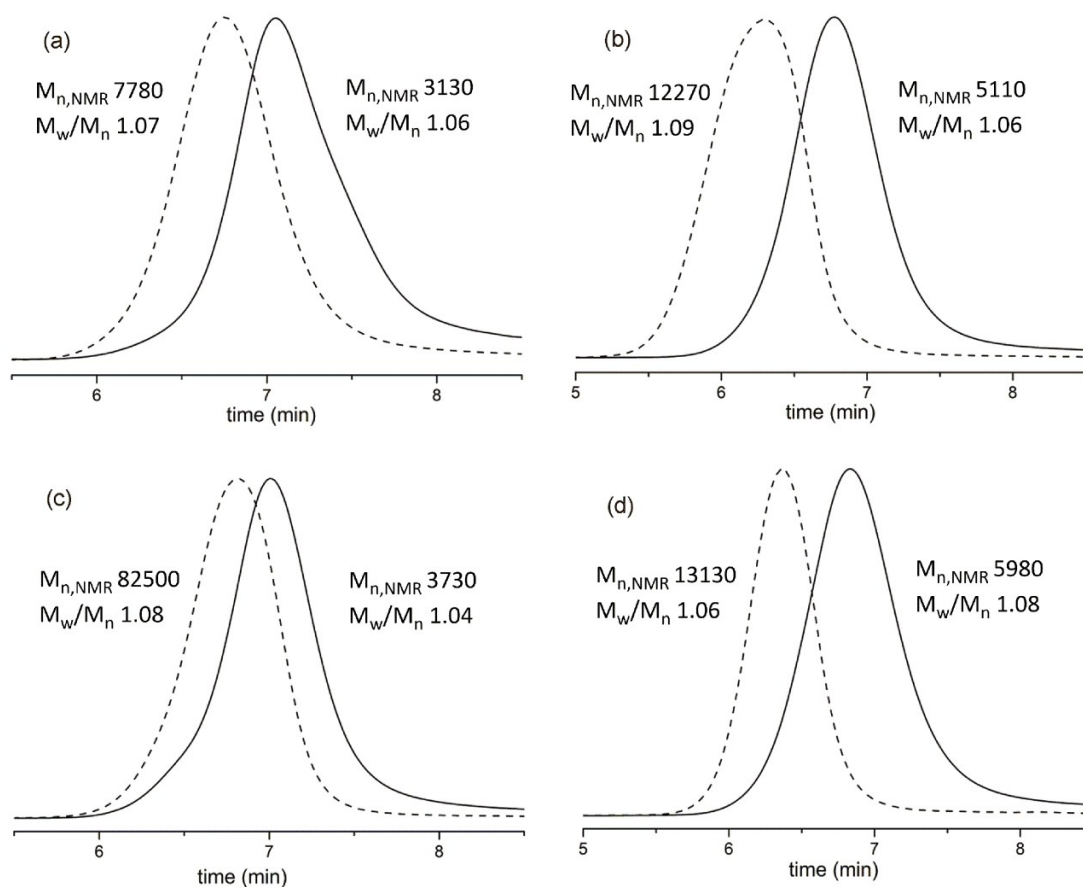

**Figure S2:** SEC traces of the first sequence of PVL (**a**, solid line; PVL, Table 1, run 1; and **b**, solid line; PVL, Table 1, run 11), and PCL (**c**, solid line; PCL, Table 1, run 3; and **d**, solid line; PCL, Table 1, run 12), the PVL-*b*-PLA diblock copolymer (**a**, dashed line; PVL-PLA, Table 1, run 14; and **b**, dashed line; PVL-PLA, Table 1, run 15), and the PCL-*b*-PLA diblock copolymer (**c**, dashed line; PCL-PLA, Table 1, run 17; and **d**, dashed line; PCL-PLA, Table 1, run 18) (eluent, THF; flow rate, 1.0 mL min<sup>-1</sup>).

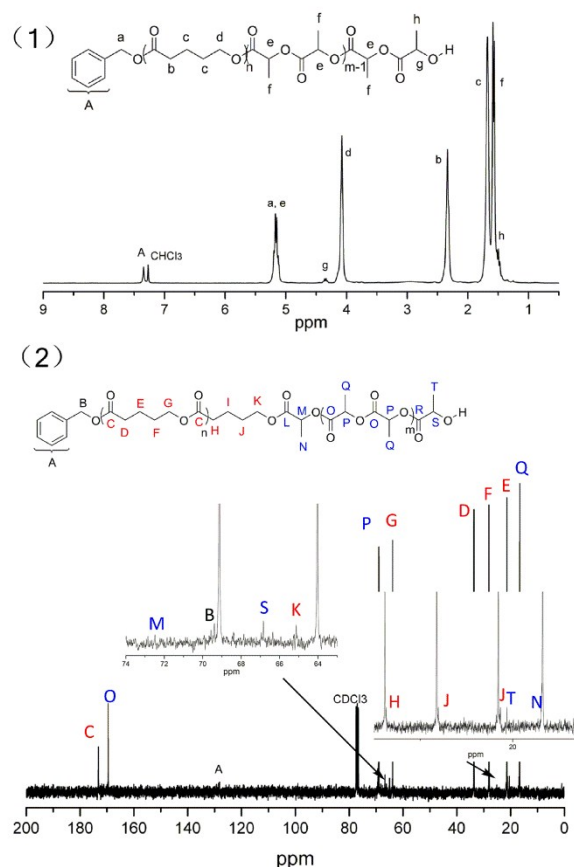

**Figure S3:** The <sup>1</sup>H NMR (1) and <sup>13</sup>C NMR (2) spectra (CDCl<sub>3</sub>) of PVL-*b*-PLLA (PVL-PLA, Table 1, run 15) initiated from benzyl alcohol (BnOH).

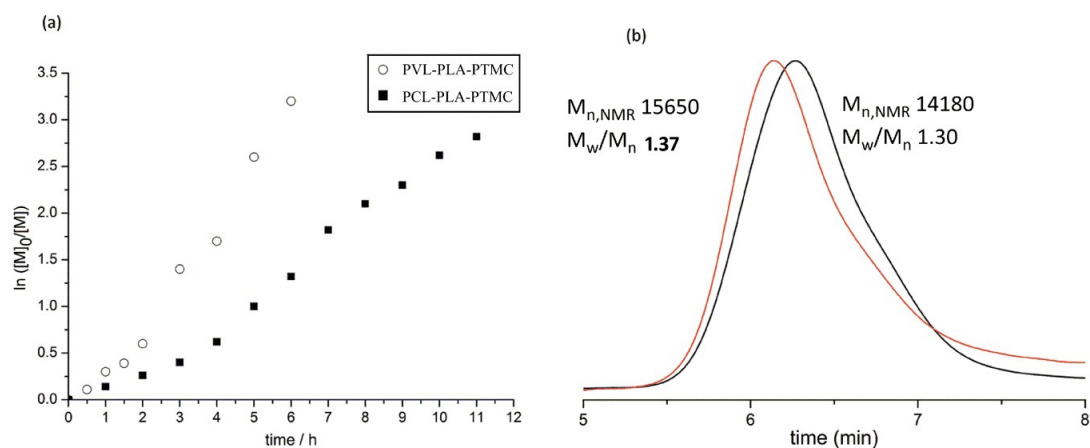

**Figure S4:** (a) The kinetics plots of TMC (○, PVL-PLA-PTMC in Table 1, run 19; ■, PCL-PLA-PTMC in Table 1, run 20) in their third feed ROPs, and (b) The SEC traces of the triblock terpolymers (black, PVL-PLA-PTMC; red, PCL-PLA-PTMC) (eluent, THF; flow rate, 1.0 mL min<sup>-1</sup>).

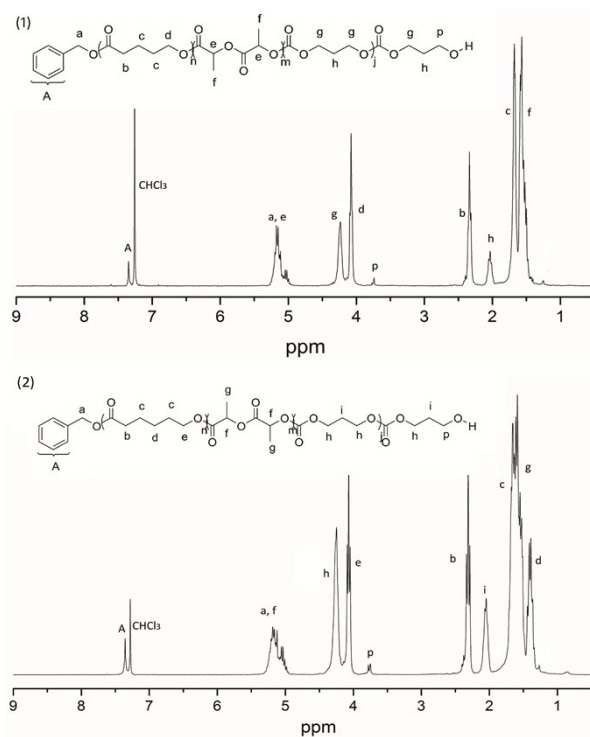

**Figure S5:** The  $^1\text{H}$  NMR spectra ( $\text{CDCl}_3$ , 300 MHz) of (1) PVL-*b*-PLLA-*b*-PTMC triblock terpolymer (Table 1, run 19) and (2) PCL-*b*-PLLA-*b*-PTMC triblock terpolymer (Table 1, run 20) initiated from benzyl alcohol (BnOH).

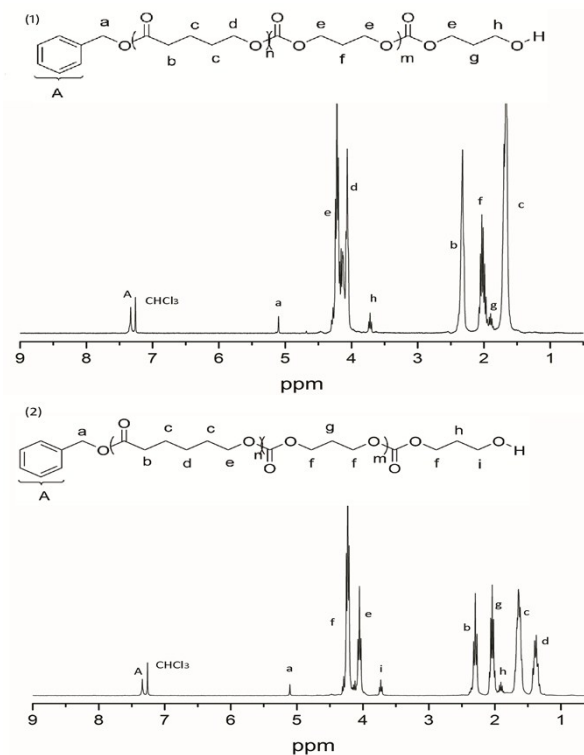

**Figure S6:** The  $^1\text{H}$  NMR spectra ( $\text{CDCl}_3$ , 300 MHz) of (1) PVL-*b*-PTMC diblock copolymer (Table 2, run 21) and (2) PCL-*b*-PTMC diblock copolymer (Table 2, run 22) initiated from benzyl alcohol (BnOH).



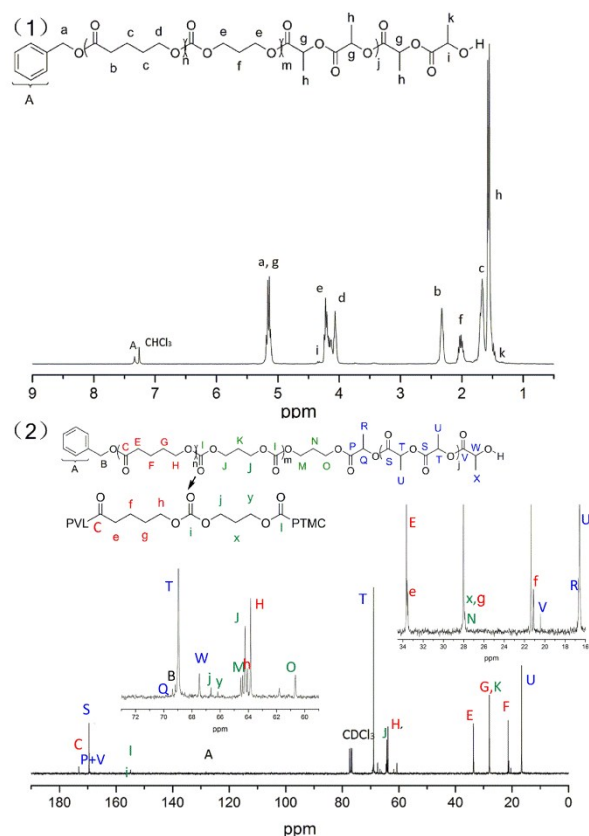

**Figure S7:** The  $^1\text{H}$  NMR (1) and  $^{13}\text{C}$  NMR (2) spectra ( $\text{CDCl}_3$ ) of PVL-*b*-PTMC-*b*-PLLA (PVL-PTMC-PLA, Table 2, run 25) initiated from benzyl alcohol (BnOH).

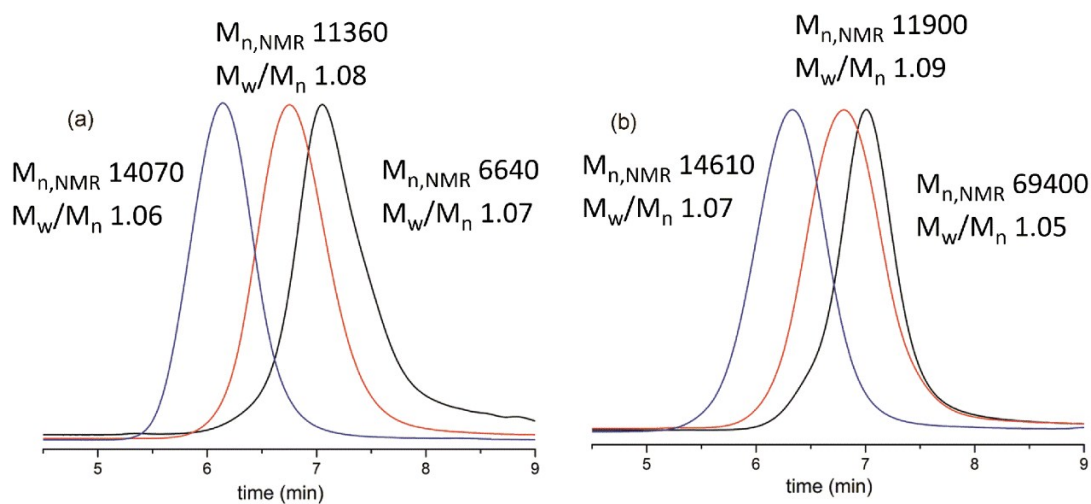

**Figure S8:** SEC traces of **(a)** the diblock copolymer of PVL-*b*-PTMC (black, PVL-PTMC, Table 2, run 21), the triblock terpolymer PVL-*b*-PTMC-*b*-PLA (red, PVL-PTMC-PLA, Table 2, run 23) and the triblock terpolymer PVL-*b*-PTMC-*b*-PLA (blue, PVL-PTMC-PLA, Table 2, run 25); and **(b)** the diblock copolymer of PCL-*b*-PTMC (black, PCL-PTMC, Table 2, run 22), the triblock terpolymer PCL-*b*-PTMC-*b*-PLA (red, PCL-PTMC-PLA, Table 2, run 22), and the triblock terpolymer PCL-*b*-PTMC-*b*-PLA (blue, PCL-PTMC-PLA, Table 2, run 22).

Table 2, run 24) and the triblock terpolymer PCL-*b*-PTMC-*b*-PLA (blue, PCL-PTMC-PLA, Table 2, run 26) (eluent, THF; flow rate, 1.0 mL min<sup>-1</sup>).
